# Supplementary material for: Magnetic nanoparticles coated with immobilized alkaline phosphatase for enzymolysis and enzyme inhibition assays
Source: Royal Society of Chemistry journal article supplement (doi:10.1039/c3tb00562c), 2013-01-01
Supplement: c3tb00562c.pdf [file c3tb00562c.pdf]

## Supporting Information

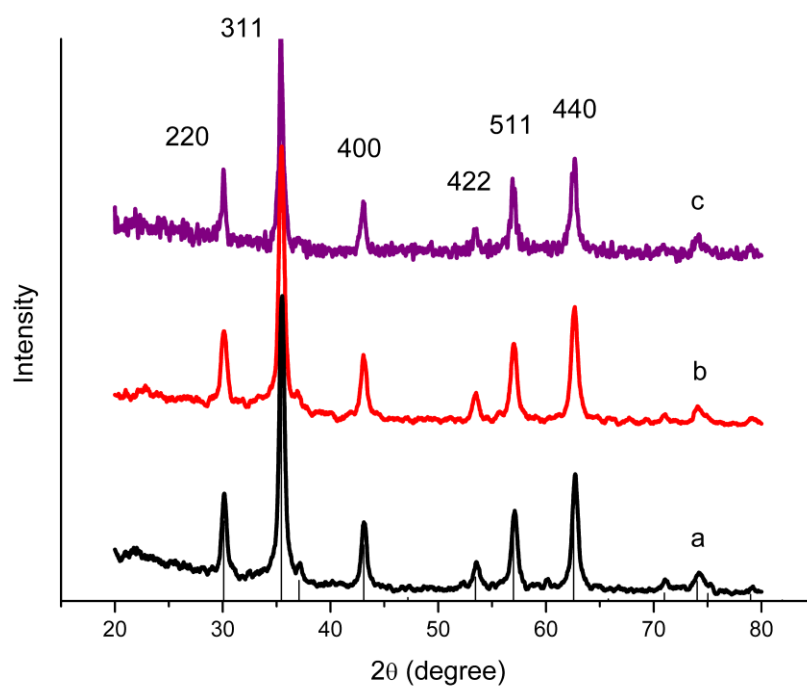

Figure S1. X-ray diffraction patterns of  $\text{Fe}_3\text{O}_4$  (a),  $\text{Fe}_3\text{O}_4@\text{SiO}_2$  (b) and  $\text{Fe}_3\text{O}_4@\text{SiO}_2@\text{APES}$  (c).

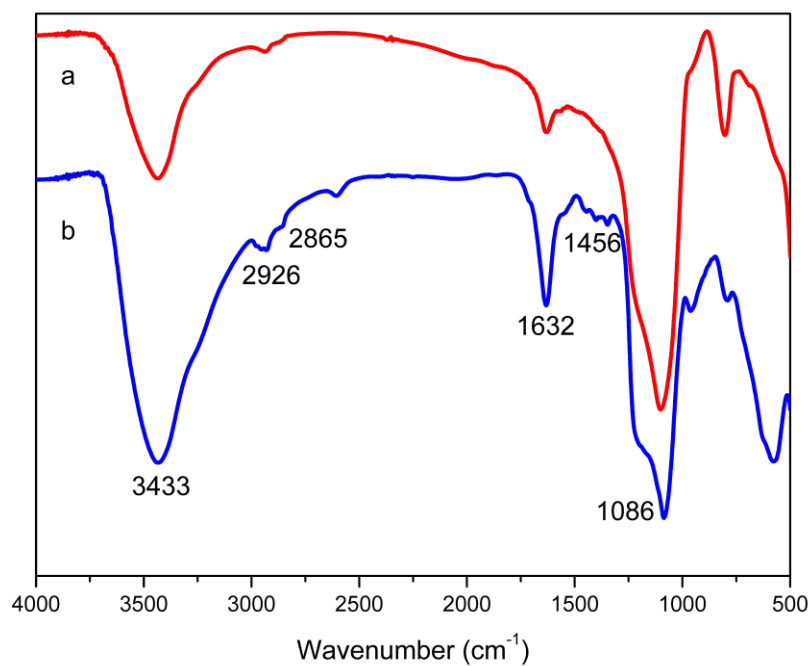

Figure S2. FTIR spectra of  $\text{Fe}_3\text{O}_4@\text{SiO}_2$  (a) and immobilized ALP magnetic nanoparticles (b).

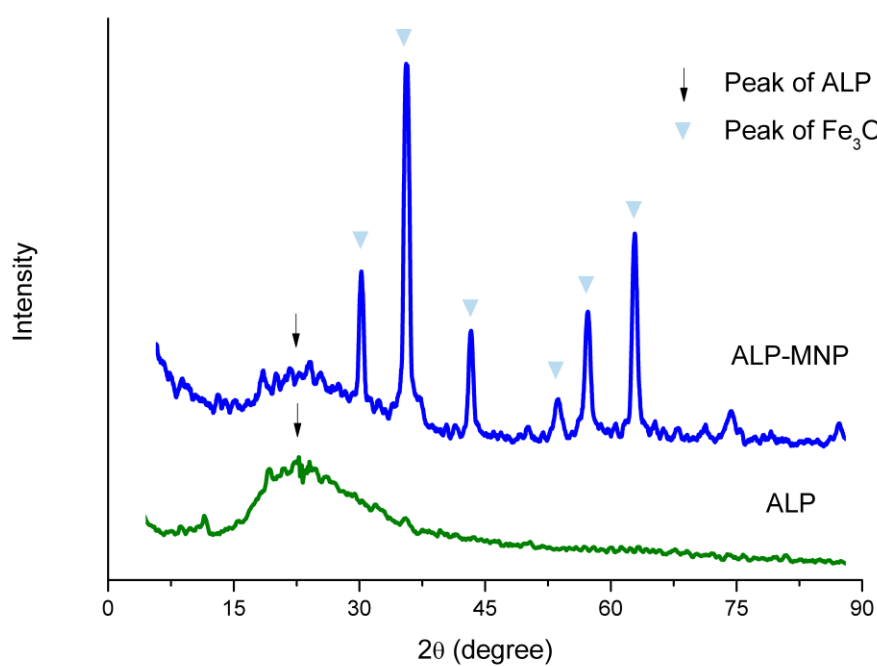

Figure S3. X-ray diffraction patterns of immobilized ALP magnetic nanoparticles and free ALP.
